# Supplementary material
Source: PubMed Central journal article supplement (PMC4642602)
Supplement: i1552-5783-56-12-7331-s01.pdf [file i1552-5783-56-12-7331-s01.pdf]

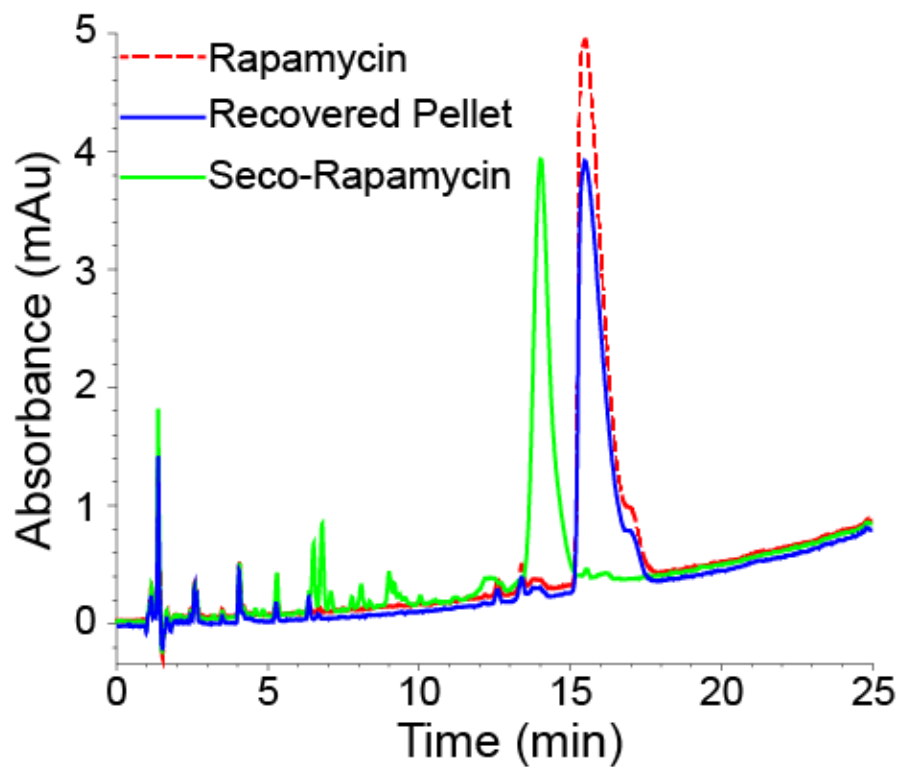

**Supplemental Figure 1** An example HPLC trace showing a recovered pellet of rapamycin from a device after 16 weeks of in vitro release (blue line). A positive control of fresh rapamycin (red, dashed line) and seco-rapamycin (green line) are included for comparison.

Concentration of Rapamycin in the Vitreous (ng/mL)

| Time (Weeks)                     | 0.4  | 4    | 4    | 8    | 8    | 16   | 16   | 16   |
|----------------------------------|------|------|------|------|------|------|------|------|
| 6 mm Device, Acute Arm           | 16.9 | 3.39 | 5.27 | 1.34 | 4.37 | 3.04 | 4.96 | -    |
| 6 mm Device, Microvitrectomy Arm | -    | -    | -    | -    | -    | 4.11 | 11.1 | 2.62 |

Concentration of Rapamycin in the Retina-Choroid (ng/g)

| Time (Weeks)                     | 0.4  | 4   | 4    | 8   | 8   | 16  | 16  | 16  |
|----------------------------------|------|-----|------|-----|-----|-----|-----|-----|
| 6 mm Device, Acute Arm           | 87.8 | 194 | 1070 | 255 | 107 | 257 | 122 | -   |
| 6 mm Device, Microvitrectomy Arm | -    | -   | -    | -   | -   | 201 | 134 | 318 |

**Supplemental Figure 2** Values for in vivo concentrations of rapamycin in the vitreous and the retina-choroid.

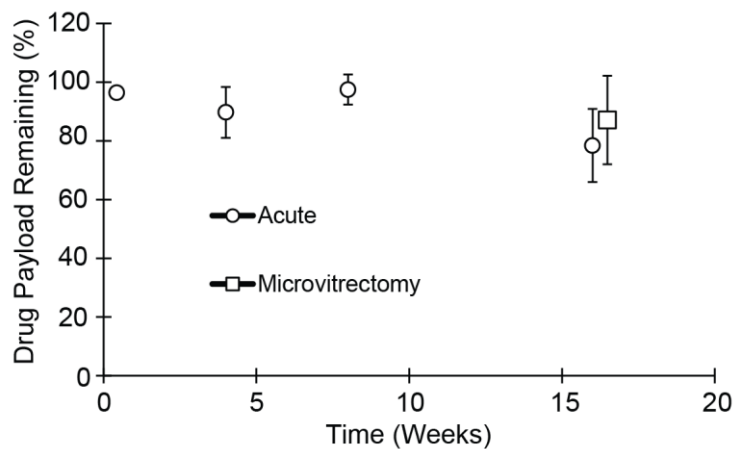

**Supplemental Figure 3** Residual drug payloads for in vivo samples as a percentage of their loaded mass. Week 16 data has been separated laterally for clarity.
